# Supplementary material
Source: PubMed Central journal article supplement (PMC2923909)
Supplement: pp.110.157370_1.pdf [file pp.110.157370_1.pdf]

**Supplemental Table 1.** *pal* mutants analyzed in the study

| Gene        | Locus     | Mutant                             | Expression compared with WT (Real time PCR) |
|-------------|-----------|------------------------------------|---------------------------------------------|
| <i>PAL1</i> | At2g37040 | <i>pal1-2</i>                      | 0.005                                       |
|             |           | <i>pal1-3</i>                      | 0.000                                       |
|             |           | <i>pal1-2 pal2-2 pal3-1 pal4-1</i> | 0.007                                       |
|             |           | <i>pal1-3 pal2-3 pal3-2 pal4-2</i> | 0.004                                       |
| <i>PAL2</i> | At3g53260 | <i>pal2-2</i>                      | 0.009                                       |
|             |           | <i>pal2-3</i>                      | 0.008                                       |
|             |           | <i>pal1-2 pal2-2 pal3-1 pal4-1</i> | 0.011                                       |
|             |           | <i>pal1-3 pal2-3 pal3-2 pal4-2</i> | 0.006                                       |
| <i>PAL3</i> | At5g04230 | <i>pal3-1</i>                      | 0.012                                       |
|             |           | <i>pal3-2</i>                      | 0.009                                       |
|             |           | <i>pal1-2 pal2-2 pal3-1 pal4-1</i> | 0.011                                       |
|             |           | <i>pal1-3 pal2-3 pal3-2 pal4-2</i> | 0.010                                       |
| <i>PAL4</i> | At3g10340 | <i>pal4-1</i>                      | 0.010                                       |
|             |           | <i>pal4-2</i>                      | 0.003                                       |
|             |           | <i>pal1-2 pal2-2 pal3-1 pal4-1</i> | 0.009                                       |
|             |           | <i>pal1-3 pal2-3 pal3-2 pal4-2</i> | 0.005                                       |

**Supplemental Table 2.** Pollen numbers of WT and *pal1 pal2* mutants

| Plants                   | Pollens number released per flower <sup>a</sup> |                                       |
|--------------------------|-------------------------------------------------|---------------------------------------|
|                          | 120 $\mu\text{E m}^{-2} \text{s}^{-1}$          | 50 $\mu\text{E m}^{-2} \text{s}^{-1}$ |
| WT                       | 893 $\pm$ 165                                   | 435 $\pm$ 78                          |
| <i>pal1-2/- pal2-2/-</i> | 101 $\pm$ 23                                    | TFTC <sup>b</sup>                     |
| <i>pal1-3/- pal2-3/-</i> | 98 $\pm$ 34                                     | TFTC                                  |

<sup>a</sup> Average pollen numbers released per flowers and standard errors were calculated from 12 flowers per genotype per condition (light intensity). According to Duncan's multiple range test (P=0.05), means of pollen numbers per flower grown under 120  $\mu\text{E m}^{-2} \text{s}^{-1}$  differ significantly between wild type and the two *pal* double mutants but not significant between the two *pal* double mutants. The *pal* double mutants produced too few pollens under 50  $\mu\text{E m}^{-2} \text{s}^{-1}$  and, therefore, statistical analysis for comparing pollen numbers between wild type and the mutants was not performed.

<sup>b</sup> TFTC, too few to count.

**Supplemental Table 3.** Primers used for mutant identification and Real time PCR

| Gene        | Mutant identification                                     | Real time PCR                                             |
|-------------|-----------------------------------------------------------|-----------------------------------------------------------|
| <i>PAL1</i> | 5'-CTGCAGCGGAGCAAATGA-3'<br>5'-CACTCATCACCTCTGCGAAA-3'    | 5'-GTGTCGCACTTCAGAAGGAA-3'<br>5'-GGCTTGTTTCTTTTCGTGCTT-3' |
| <i>PAL2</i> | 5'-CAATGGATCAAATCGAAGCA-3'<br>5'-TATTCCGGCGTTCAAAAATC-3'  | 5'-GTGCTACTTCTCACCGGAGA-3'<br>5'-TATTCCGGCGTTCAAAAATC-3'  |
| <i>PAL3</i> | 5'-AACCCCATTTGTTTTCCCTCT-3'<br>5'-GCTCTTTTTGAAGAGCAGCA-3' | 5'-CAACCAAACGCAACAGCA-3'<br>5'-CTCCAGGTGGCTCCCTTTTA-3'    |
| <i>PAL4</i> | 5'-TCAAATACCGAATCGAAGCA-3'<br>5'-TATTCCGGCATTCAAGAACC-3'  | 5'-GGTGCACTTCAAATGAGCT-3'<br>5'-CAACGTGTGTGACGTGTCC-3'    |
